# Supplementary material for: Moiré-of-Moiré phases formed in twisted graphene/hexagonal boron nitride heterostructures under high pressure
Source: Royal Society of Chemistry journal article supplement (doi:10.1039/d3cp05098j), 2023-12-23
Supplement: d3cp05098j1.pdf [file d3cp05098j1.pdf]

**SUPPLEMENTARY MATERIAL:**

**Moiré-of-Moiré phases formed in twisted graphene/hexagonal boron nitride  
heterostructures under high pressure**

Yaomin Li, Bin Zhang\*

*State Key Laboratory of Mechanics and Control for Aerospace Structures, College of  
Aerospace Engineering, Nanjing University of Aeronautics and Astronautics, No. 29 Yudao  
Street, Nanjing 210016, China*

Corresponding author

\* Bin Zhang. E-mail: [beenchang@nuaa.edu.cn](mailto:beenchang@nuaa.edu.cn)

A. The Wyckoff positions and full atomic coordinates (in fractional) of  $m\text{-BC}_2\text{N-}21.78^\circ$

**Table S1.** The Wyckoff positions and full atomic coordinates (in fractional) of  $m\text{-BC}_2\text{N-}21.78^\circ$  under zero pressure

| Crystal                             | Groups                     | Wyckoff positions             | Atomic coordinates             |
|-------------------------------------|----------------------------|-------------------------------|--------------------------------|
| $m\text{-BC}_2\text{N}$<br>(21.78°) | $P3$ (143)                 |                               | C1 0.306880 0.437640 0.674420  |
|                                     |                            |                               | C2 0.398300 0.121620 0.645860  |
|                                     |                            |                               | C3 0.106620 0.464340 0.790210  |
|                                     |                            |                               | C4 0.268160 0.209020 0.826620  |
|                                     |                            |                               | C5 0.562360 0.869240 0.674420  |
|                                     |                            |                               | C6 0.878380 0.276680 0.645860  |
|                                     |                            |                               | C7 0.535660 0.642280 0.790210  |
|                                     |                            |                               | C8 0.790980 0.059140 0.826620  |
|                                     |                            |                               | C9 0.130760 0.693120 0.674420  |
|                                     |                            |                               | C10 0.723320 0.601700 0.645860 |
|                                     |                            |                               | C11 0.357720 0.893380 0.790210 |
|                                     |                            |                               | C12 0.940860 0.731840 0.826620 |
|                                     |                            |                               | C13 0.000000 0.000000 0.912360 |
|                                     |                            |                               | C14 0.666670 0.333330 0.688260 |
|                                     | N1 0.87561 0.59836 0.12926 | N1 0.875610 0.598360 0.129260 |                                |
|                                     | N2 0.12858 0.44146 0.15338 | N2 0.128580 0.441460 0.153380 |                                |
|                                     | N3 0.00000 0.00000 0.26108 | N3 0.401640 0.277250 0.129260 |                                |
|                                     | B1 0.10735 0.64607 0.28456 | N4 0.558540 0.687120 0.153380 |                                |
|                                     | B2 0.94060 0.21604 0.31233 | N5 0.722750 0.124390 0.129260 |                                |
|                                     | B3 0.66667 0.33333 0.05198 | N6 0.312880 0.871420 0.153380 |                                |
|                                     |                            | N7 0.000000 0.000000 0.261080 |                                |
|                                     |                            | B1 0.107350 0.646070 0.284560 |                                |
|                                     |                            | B2 0.940600 0.216040 0.312330 |                                |
|                                     |                            | B3 0.353930 0.461280 0.284560 |                                |
|                                     |                            | B4 0.783960 0.724560 0.312330 |                                |
|                                     |                            | B5 0.538720 0.892650 0.284560 |                                |
|                                     |                            | B6 0.275440 0.059400 0.312330 |                                |
|                                     |                            | B7 0.666670 0.333330 0.051980 |                                |

## B. Verification of elastic constants $C_{ij}$ calculations

**Table S2.** Comparison of DFT-calculated elastic constants  $C_{ij}$  (in GPa) for diamond and *c*BN with reported experimental and DFT results.

| Crystal     | $C_{11}$ | $C_{22}$ | $C_{33}$ | $C_{44}$ | $C_{55}$ | $C_{66}$ | $C_{12}$ | $C_{13}$ | $C_{23}$ | Source             |
|-------------|----------|----------|----------|----------|----------|----------|----------|----------|----------|--------------------|
| Diamond     | 1054.4   | -        | -        | 563.1    | -        | -        | 120.0    | -        | -        | This               |
|             | 1076     | -        | -        | 577      | -        | -        | 125      | -        | -        | Expt. <sup>1</sup> |
|             | 1099     | -        | -        | 590      | -        | -        | 149      | -        | -        | Cal. <sup>2</sup>  |
| <i>c</i> BN | 853.4    | -        | -        | 497.4    | -        | -        | 215.8    | -        | -        | This               |
|             | 820      | -        | -        | 480      | -        | -        | 190      | -        | -        | Expt. <sup>3</sup> |
|             | 823      | -        | -        | 479      | -        | -        | 185      | -        | -        | Cal. <sup>4</sup>  |

## C. Verification of electronic band structure calculations

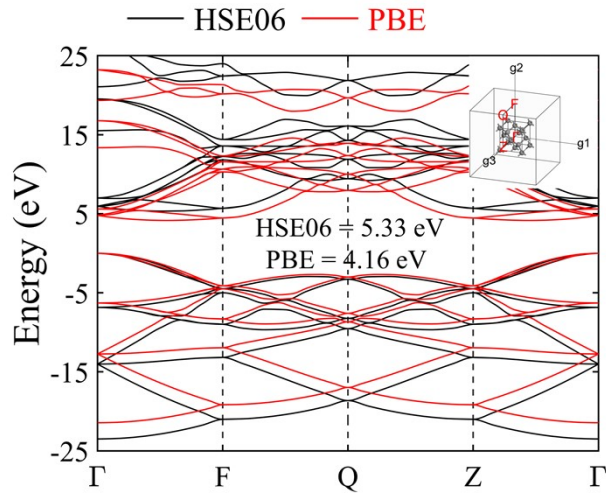

**Figure S1.** Electronic band structures of diamond, where the black lines are obtained from HSE06 functional, the red lines are obtained from PBE functional. It can be observed that HSE06 increases only the values of band gap without causing any qualitative changes in the band structure.

### D. Verification of size-dependent effects on the structural stability of $m\text{-BC}_2\text{N}$ ( $21.78^\circ$ )

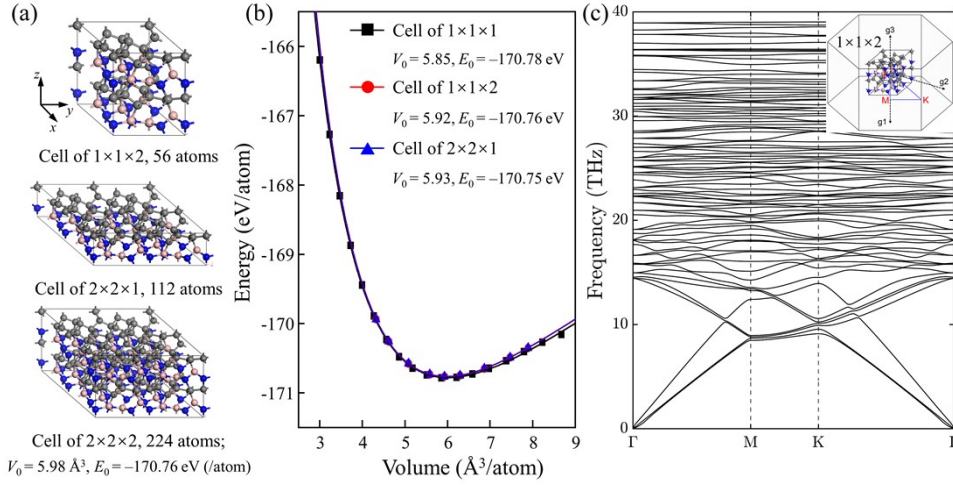

**Figure S2.** The validation of size-dependent effects on the structural stability of  $m\text{-BC}_2\text{N}$  ( $21.78^\circ$ ). (a) Upon full relaxation at zero pressure, the atomic structure of the  $1 \times 1 \times 2$ ,  $2 \times 2 \times 1$ , and  $2 \times 2 \times 2$  supercell units maintains a perfect  $sp^3$  configuration. (b) The total energy per atom of the  $1 \times 1 \times 2$  and  $2 \times 2 \times 1$  supercell as a function of atomic density, exhibits a high degree of consistency compared to the  $1 \times 1 \times 1$  unit. (c) Phonon dispersion relation of  $1 \times 1 \times 2$  supercell reveals no occurrence of imaginary frequencies. These findings collectively support the stability of  $m\text{-BC}_2\text{N}$  ( $21.78^\circ$ ) regardless of its unit cell dimensions.

### F. Band structure of $m\text{-BC}_2\text{N}$ ( $9.43^\circ$ )

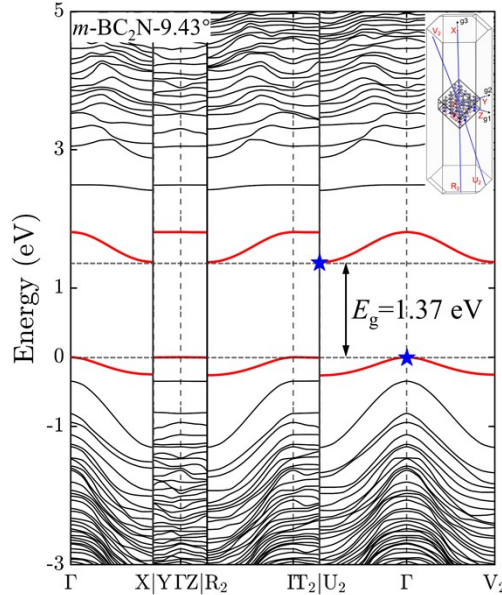

**Figure S3.** The electronic band structures along the high symmetry direction in the Brillouin zone of  $m\text{-BC}_2\text{N}$  ( $9.43^\circ$ ). Additionally, the band structure shows a characteristic of p-doped semiconductors. This finding aligns with the minute peak observed at the Fermi point in the DOS curve (Figure 9a).

## References

- 1 M. Grimsditch and A. Ramdas, *Phys. Rev. B*, 1975, **11**, 3139.
- 2 Y. Cheng, R. Melnik, Y. Kawazoe and B. Wen, *Cryst. Growth Des.*, 2016, **16**, 1360-1365.
- 3 M. Grimsditch, E. Zouboulis and A. Polian, *J. Appl. Phys.*, 1994, **76**, 832-834.
- 4 Q. Fan, Q. Wei, H. Yan, M. Zhang, Z. Zhang, J. Zhang and D. Zhang, *Comput. Mater. Sci.*, 2014, **85**, 80-87.
